# Supplementary material for: Contribution of type W human endogenous retroviruses to the human genome: characterization of HERV-W proviral insertions and processed pseudogenes
Source: Retrovirology. 2016 Sep 9;13(1):67. doi: 10.1186/s12977-016-0301-x (PMC5016936; doi:10.1186/s12977-016-0301-x)
Supplement: Supplementary file 1 — 10.1186/s12977-016-0301-x HERV-W elements identification in Human Genome assembly GRch37/hg19. [file 12977_2016_301_MOESM1_ESM.docx]

| **Table S1. HERV-W elements identification in Human Genome assembly GRch37/hg19**   | **Locus** | **Strand** | **Start** | **End** | **Type** | **Subgroupa** | **PBS type** | **O.C.Ab** | **Agec** | | --- | --- | --- | --- | --- | --- | --- | --- | --- | | 1p34.2 | + | 42410127 | 42415982 | pseudogene | 1 | -d | Rhesus | 32,52 | | 1p33a | - | 46851453 | 46856995 | pseudogene | 1 | W | Gibbon | 26,99 | | 1p33b | + | 47417563 | 47424579 | pseudogene | 1 | W | Rhesus | 33,82 | | 1p32.3a | + | 51692797 | 51696169 | pseudogene | 2 | - | Rhesus | 30,11 | | 1p32.3b | - | 55376682 | 55385198 | provirus | 1 | W | Rhesus* | 26,82 | | 1p32.2 | - | 56248856 | 56254641 | provirus | 2A | F | Rhesus | 32,99 | | 1p22.2a | + | 89390212 | 89397564 | pseudogene | 1 | W | Rhesus | 32,09 | | 1p22.2b | + | 91644689 | 91646698 | pseudogene | 1 | - | Rhesus | 24,73 | | 1p13.3 | - | 110394855 | 110400764 | provirus | 1 | - | Orangutan | 29,30 | | 1p12 | - | 119710922 | 119713987 | pseudogene | 1 | - | Rhesus | 26,34 | | 1q22 | - | 155592180 | 155596455 | undefined | - | - | Orangutan | - | | 1q25.2 | - | 178110353 | 178112194 | pseudogene | 2 | - | Rhesus | 39,24 | | 1q32.1 | - | 205835460 | 205840608 | pseudogene | 2 | - | Rhesus | 36,76 | | 1q32.3a | - | 212029138 | 212031215 | pseudogene | 1 | - | Rhesus | 31,32 | | 1q32.3b | + | 212031216 | 212032263 | undefined | - | - | Rhesus | - | | 1q42.13 | - | 227812215 | 227821260 | provirus | 2A | F | Rhesus | 39,88 | | 2p25.3 | - | 153394 | 160782 | provirus | 1 | W | Rhesus* | 24,45 | | 2p24.2 | + | 17520208 | 17527981 | provirus | 1 | R | Gibbon | 23,94 | | 2p23.1a | + | 30738819 | 30743130 | provirus | 2A | F | Rhesus | 39,00 | | 2p23.1b | + | 31854223 | 31859227 | pseudogene | 1 | R | Orangutan | 35,12 | | 2p22.3 | + | 33882489 | 33889522 | pseudogene | 1 | R | Rhesus | 35,90 | | 2p16.2 | + | 53983776 | 53988563 | pseudogene | 2 | W | Rhesus | 39,45 | | 2p12a | + | 76098816 | 76106624 | provirus | 1 | W | Gibbon | 30,23 | | 2p12b | - | 79390297 | 79397477 | pseudogene | 1 | R | Rhesus | 25,22 | | 2q11.2 | - | 96882882 | 96889063 | pseudogene | 2 | W | Gibbon | 31,15 | | 2q12.2 | + | 106825670 | 106832132 | pseudogene | 1 | W | Rhesus | 19,27 | | 2q13 | - | 112796923 | 112802566 | pseudogene | 1 | W | Rhesus | 35,18 | | 2q22.1 | - | 136959456 | 136960929 | pseudogene | 1 | - | Gibbon | 40,75 | | 2q22.2 | - | 143656248 | 143665468 | provirus | 2B | N | Rhesus | 45,10 | | 2q22.3 | + | 147756109 | 147758691 | undefined | - | R | Rhesus | - | | 2q24.3 | - | 165514421 | 165516121 | pseudogene | 1 | - | Gibbon | 23,59 | | 2q31.1a | - | 172416543 | 172418614 | pseudogene | 1 | - | Gibbon | 49,74 | | 2q31.1b | + | 176189870 | 176191257 | pseudogene | 1 | - | Gibbon | 39,76 | | 2q31.2a | - | 178273969 | 178277886 | pseudogene | 2 | W | Rhesus | 39,66 | | 2q31.2b | + | 179327137 | 179328271 | pseudogene | 1 | - | Gibbon | 36,14 | | 2q31.3 | + | 181096404 | 181104046 | provirus | 2A | I | Rhesus | 42,88 | | 2q32.3 | - | 196199400 | 196204796 | pseudogene | 2 | P | Rhesus | 38,56 | | 2q35 | - | 218455569 | 218457491 | pseudogene | 1 | - | Rhesus | 31,16 | | 2q37.3 | - | 239902211 | 239904111 | pseudogene | 1 | - | Rhesus | 24,56 | | 3p24.3 | - | 19913287 | 19918128 | pseudogene | 1 | W | Gibbon | 24,16 | | 3p24.1 | + | 27042514 | 27047921 | provirus | 1 | W | Gibbon | 28,64 | | 3p22.2 | - | 38330909 | 38338816 | provirus | 1 | R | Rhesus | 30,01 | | 3p22.1 | + | 39699867 | 39701564 | pseudogene | 1 | - | Rhesus | 22,10 | | 3p21.31 | - | 48372016 | 48377731 | pseudogene | 2 | ?e | Rhesus | 42,89 | | 3p12.3 | - | 74921984 | 74927237 | pseudogene | 1 | R | Rhesus | 35,77 | | 3p11.1 | - | 87989983 | 87995529 | pseudogene | 1 | W | Gibbon | 25,93 | | 3q11.2 | - | 96385297 | 96394288 | provirus | 1 | W | Gibbon | 28,33 | | 3q13.31 | + | 115463422 | 115469539 | pseudogene | 2 | - | Rhesus | 35,56 | | 3q13.32 | + | 118561539 | 118570538 | undefined | - | - | Rhesus | - | | 3q22.1 | - | 130915705 | 130918941 | pseudogene | 1 | - | Orangutan | 22,17 | | 3q22.2 | + | 135654191 | 135657750 | pseudogene | 1 | - | Gibbon | 21,10 | | 3q23a | + | 141538627 | 141540355 | pseudogene | 1 | - | Orangutan | 20,93 | | 3q23b | + | 142157021 | 142162495 | pseudogene | 1 | - | Gibbon | 25,05 | | 3q25.1a | - | 149474249 | 149476612 | pseudogene | 1 | - | Rhesus | 27,41 | | 3q25.1b | + | 150572043 | 150579124 | pseudogene | 1 | W | Rhesus | 21,75 | | 3q25.2 | + | 154695864 | 154697090 | pseudogene | 1 | - | Gibbon | 59,38 | | 3q26.1a | + | 162040467 | 162046157 | pseudogene | 1 | - | Gibbon | 27,84 | | 3q26.1b | - | 163412265 | 163418737 | provirus | 2A | - | Rhesus | 51,85 | | 3q26.31 | + | 172438594 | 172441229 | undefined | - | - | Rhesus | - | | 3q26.32 | + | 178772379 | 178777943 | pseudogene | 1 | W | Rhesus | 27,61 | | 3q28 | + | 191376573 | 191383381 | pseudogene | 1 | W | Gibbon | 25,48 | | 4p16.3 | - | 185552 | 190863 | provirus | 2A | W | Rhesus | 36,18 | | 4p16.1 | + | 8422092 | 8429492 | provirus | 2A | ? | Rhesus | 46,40 | | 4p15.1 | + | 33743127 | 33744972 | provirus | 1 | - | Gibbon | 52,41 | | 4p14 | - | 36442153 | 36445845 | pseudogene | 2 | - | Rhesus | 39,49 | | 4p13 | - | 42287455 | 42294913 | provirus | 1 | W | Rhesus | 29,50 | | 4q13.1 | + | 63836735 | 63843478 | provirus | 2A | E | Rhesus | 46,58 | | 4q13.3 | - | 73791293 | 73798903 | provirus | 1 | W | Gibbon | 28,59 | | 4q21.22 | + | 83394470 | 83401206 | provirus | 1 | R | Rhesus | 35,60 | | 4q21.23 | - | 86273279 | 86276547 | pseudogene | 1 | W | Rhesus | 28,85 | | 4q23 | - | 100025890 | 100031105 | pseudogene | 2 | F | Gibbon | 23,95 | | 4q24 | + | 106408946 | 106410359 | undefined | - | - | Rhesus | - | | 4q25 | - | 111200009 | 111205600 | pseudogene | 1 | W | Rhesus | 28,28 | | 4q26 | + | 114965536 | 114972972 | pseudogene | 1 | W | Gibbon | 26,84 | | 4q28.3 | + | 133803451 | 133810295 | pseudogene | 2 | W | Rhesus | 42,06 | | 4q31.1 | - | 139542941 | 139548353 | provirus | 1 | - | Rhesus | 32,78 | | 4q31.3 | + | 153762980 | 153763482 | pseudogene | 1 | - | Rhesus | 34,79 | | 4q32.3 | + | 165576784 | 165579304 | pseudogene | 1 | - | Rhesus | 46,94 | | 4q33 | - | 171111343 | 171118255 | pseudogene | 2 | W | Rhesus | 37,72 | | 4q35.1 | + | 183920546 | 183925533 | pseudogene | 1 | - | Gibbon | 18,01 | | 5p13.3 | - | 31395287 | 31397921 | undefined | - | - | Gibbon | - | | 5p13.2 | - | 36328801 | 36333224 | pseudogene | 1 | R | Rhesus | 30,76 | | 5p12 | + | 44111190 | 44115179 | provirus | 1 | W | Gibbon | 22,10 | | 5q11.2 | - | 56815850 | 56818716 | pseudogene | 1 | - | Rhesus | 27,16 | | 5q12.1 | + | 59954322 | 59962288 | provirus | 2B | I | Rhesus* | 28,76 | | 5q14.3a | - | 87472587 | 87473700 | pseudogene | 1 | - | Gibbon | 23,30 | | 5q14.3b | + | 89089703 | 89090854 | provirus | 1 | - | Gibbon | 62,97 | | 5q21.3 | - | 107909807 | 107914283 | provirus | 1 | - | Gibbon* | 25,28 | | 5q22.2 | + | 111779389 | 111787195 | provirus | 1 | R | Orangutan* | 20,46 | | 6p25.3 | - | 1330281 | 1331849 | pseudogene | 1 | - | Orangutan | 36,94 | | 6p23 | + | 13878567 | 13883955 | pseudogene | 2 | P | Rhesus | 32,91 | | 6p22.3 | - | 24676916 | 24683328 | provirus | 1 | W | Gibbon | 23,31 | | 6p12.2 | - | 52779674 | 52786712 | provirus | 1 | R | Rhesus* | 37,19 | | 6q12 | + | 65714885 | 65721860 | pseudogene | 1 | W | Gibbon | 29,41 | | 6q14.1 | + | 82046663 | 82053574 | provirus | 1 | W | Gibbon* | 34,15 | | 6q14.2 | + | 84153479 | 84160109 | pseudogene | 1 | W | Rhesus | 40,08 | | 6q14.3a | - | 85421420 | 85430868 | provirus | 2A | N | Rhesus | 35,48 | | 6q14.3b | + | 85653935 | 85655028 | pseudogene | 1 | - | Orangutan | 29,31 | | 6q15 | - | 89123912 | 89131226 | pseudogene | 1 | W | Gibbon | 24,15 | | 6q21a | + | 106676012 | 106683689 | pseudogene | 1 | R | Rhesus | 29,31 | | 6q21b | + | 107620616 | 107621947 | undefined | - | - | Rhesus | - | | 6q21c | + | 111452221 | 111459275 | pseudogene | 2 | S | Rhesus | 43,50 | | 6q23.3 | - | 138040065 | 138043839 | pseudogene | 1 | - | Rhesus* | 32,97 | | 6q24.2a | - | 143400938 | 143408846 | pseudogene | 2 | F | Rhesus | 30,65 | | 6q24.2b | - | 144437462 | 144442702 | pseudogene | 1 | W | Rhesus | 24,99 | | 6q27a | + | 166727385 | 166729870 | undefined | - | - | Rhesus* | - | | 6q27b | + | 167304571 | 167311741 | pseudogene | 1 | W | Rhesus | 30,55 | | 7p21.3 | - | 12892571 | 12893302 | pseudogene | 2 | - | Rhesus | 42,64 | | 7p21.1 | - | 16716694 | 16717518 | pseudogene | 1 | - | Rhesus | 39,87 | | 7p14.2 | + | 35735748 | 35736627 | provirus | 1 | - | Rhesus | 60,98 | | 7p14.1 | - | 40207037 | 40213362 | provirus | 2B | R | Rhesus | 33,16 | | 7q21.2 | - | 92097313 | 92107506 | provirus | 1 | W | Rhesus | 22,56 | | 7q31.1a | + | 107977725 | 107984934 | pseudogene | 1 | W | Rhesus | 27,33 | | 7q31.1b | - | 114019143 | 114026368 | pseudogene | 1 | W | Gibbon | 29,70 | | 7q31.31 | + | 119206200 | 119210883 | pseudogene | 1 | - | Gibbon | 29,07 | | 7q31.32 | + | 121811709 | 121817649 | provirus | 2B | - | Rhesus | 49,00 | | 7q32.3 | - | 131505601 | 131509683 | provirus | 2A | - | Rhesus | 34,32 | | 7q33 | + | 134270175 | 134277767 | provirus | 2A | F | Rhesus | 31,40 | | 7q36.1 | + | 149368691 | 149374312 | provirus | 2B | ? | Rhesus | 37,57 | | 8p21.3 | + | 20012257 | 20017145 | pseudogene | 2 | F | Rhesus | 45,74 | | 8q11.21 | - | 49148502 | 49151947 | pseudogene | 1 | - | Orangutan | 18,77 | | 8q12.1 | - | 61331973 | 61338078 | pseudogene | 2 | I | Rhesus | 27,03 | | 8q12.3a | - | 63507960 | 63509929 | pseudogene | 1 | - | Gibbon* | 17,69 | | 8q12.3b | + | 65675513 | 65680917 | pseudogene | 2 | L | Rhesus | 31,16 | | 8q13.2 | + | 68834197 | 68835866 | pseudogene | 1 | - | Rhesus | 16,94 | | 8q21.11 | + | 74734099 | 74734838 | pseudogene | 1 | - | Gibbon | 34,35 | | 8q21.13 | + | 81651951 | 81655427 | pseudogene | 1 | - | Rhesus | 28,96 | | 8q24.13 | - | 125912007 | 125919468 | provirus | 2A | ? | Rhesus | 32,19 | | 9p24.1 | + | 8747223 | 8748523 | pseudogene | 1 | - | Gibbon | 25,00 | | 9p21.3 | + | 22823028 | 22823838 | pseudogene | 1 | - | Rhesus | 60,62 | | 9p21.1 | - | 29656373 | 29658925 | undefined | - | - | Rhesus | - | | 9p13.3 | - | 35640305 | 35642827 | provirus | 1 | - | Gibbon | 25,06 | | 9q22.1 | - | 91554926 | 91559339 | pseudogene | 1 | R | Rhesus | 29,73 | | 9q22.31 | + | 94742841 | 94744363 | pseudogene | 1 | - | Rhesus | 40,89 | | 9q31.3 | + | 114098689 | 114100459 | pseudogene | 1 | - | Gibbon | 20,01 | | 10p12.2 | - | 23585121 | 23591090 | pseudogene | 1 | R | Gibbon | 28,02 | | 10q11.22 | - | 49873340 | 49875049 | pseudogene | 1 | - | Gibbon | 27,58 | | 10q21.2 | - | 62793461 | 62799671 | provirus | 2A | W | Rhesus | 31,53 | | 10q21.3 | + | 65804516 | 65805376 | pseudogene | 1 | - | Gibbon | 32,31 | | 10q23.1 | - | 86285127 | 86290825 | provirus | 1 | R | Rhesus | 32,39 | | 10q23.33 | - | 96594327 | 96601288 | pseudogene | 1 | R | Gibbon | 28,63 | | 10q24.1 | - | 97477116 | 97484627 | pseudogene | 2 | W | Rhesus | 29,80 | | 11p15.4 | - | 9369352 | 9371164 | pseudogene | 1 | - | Rhesus | 34,47 | | 11p14.3a | - | 22334363 | 22339865 | provirus | 1 | W | Gibbon | 31,04 | | 11p14.3b | + | 26023135 | 26027273 | provirus | - | - | Rhesus | 32,28 | | 11p14.2 | - | 26611978 | 26619222 | provirus | 2B | G | Rhesus | 29,72 | | 11p12 | + | 38623139 | 38628790 | provirus | 2A | F | Rhesus | 41,84 | | 11q14.1 | - | 77569373 | 77574526 | pseudogene | 1 | W | Rhesus | 27,24 | | 11q14.2 | - | 86544534 | 86547860 | pseudogene | 1 | - | Rhesus | 29,71 | | 11q22.3 | - | 107851810 | 107853843 | pseudogene | 1 | - | Gibbon | 39,44 | | 11q23.3 | - | 117907500 | 117908549 | pseudogene | 1 | - | Rhesus | 43,37 | | 12p13.31a | + | 7333743 | 7339129 | pseudogene | 2 | F | Rhesus | 37,45 | | 12p13.31b | - | 8914006 | 8921050 | pseudogene | 2 | W | Rhesus | 34,30 | | 12p11.1 | + | 34253056 | 34255891 | pseudogene | 1 | - | Gorilla | 25,35 | | 12q12a | + | 38865383 | 38868227 | pseudogene | 1 | - | Gibbon | 23,33 | | 12q12b | + | 39030303 | 39035353 | pseudogene | 2 | ? | Gibbon | 28,41 | | 12q12c | + | 40777438 | 40783340 | provirus | 2A | ? | Rhesus | 34,25 | | 12q13.12 | - | 51296259 | 51307150 | provirus | 1 | W | Rhesus* | 34,11 | | 12q13.3 | - | 57360856 | 57362378 | undefined | - | - | Homo | - | | 12q14.1 | - | 59245647 | 59253534 | provirus | 1 | W | Gibbon | 23,29 | | 12q21.31 | + | 85187760 | 85192453 | pseudogene | 2 | ? | Rhesus | 28,96 | | 12q23.3 | + | 105337032 | 105337822 | pseudogene | 1 | - | Rhesus | 36,98 | | 12q24.31 | + | 124032964 | 124043310 | provirus | 2A | I | Rhesus | 33,77 | | 12q24.33 | - | 132357772 | 132365497 | provirus | 1 | R | Rhesus | 35,32 | | 13q13.3 | + | 37530787 | 37533118 | pseudogene | 2 | - | Rhesus | 34,09 | | 13q21.1 | + | 55627766 | 55635877 | provirus | 1 | R | Gibbon | 19,09 | | 13q21.31 | - | 65279823 | 65282432 | pseudogene | 1 | - | Rhesus | 41,48 | | 13q21.33 | + | 69795752 | 69799468 | provirus | 1 | W | Gibbon | 39,06 | | 13q31.1 | + | 83031689 | 83034708 | pseudogene | 1 | W | Gibbon | 25,74 | | 13q31.3 | + | 93693066 | 93695685 | undefined | - | - | Rhesus | - | | 14q11.2 | + | 22704447 | 22712069 | provirus | 1 | S | Gibbon* | 24,00 | | 14q12 | + | 26728928 | 26730215 | provirus | 1 | - | Gibbon | 32,55 | | 14q21.2 | - | 45488688 | 45492897 | provirus | - | - | Rhesus | 36,49 | | 14q22.1 | + | 53828360 | 53829723 | pseudogene | 1 | - | Gibbon | 22,61 | | 14q23.1 | + | 58588999 | 58592862 | pseudogene | 1 | - | Rhesus | 33,96 | | 14q32.11 | - | 91692008 | 91693212 | pseudogene | 1 | - | Gibbon | 22,43 | | 15q21.3 | - | 55597080 | 55604574 | pseudogene | 1 | W | Rhesus | 26,32 | | 15q22.32 | - | 67261563 | 67268962 | pseudogene | 1 | R | Rhesus | 36,02 | | 15q26.1 | + | 92841377 | 92845430 | pseudogene | 1 | W | Rhesus | 40,53 | | 17q12a | + | 33878307 | 33879612 | pseudogene | 1 | - | Orangutan | 23,10 | | 17q12b | + | 35689888 | 35693622 | pseudogene | 1 | - | Rhesus | 35,26 | | 17q21.33 | - | 48476362 | 48483068 | provirus | 1 | W | Rhesus | 33,89 | | 17q22 | - | 53088886 | 53095859 | pseudogene | 1 | W | Rhesus | 41,51 | | 18p11.31 | + | 4681680 | 4692409 | provirus | 1 | S | Orangutan | 31,11 | | 18p11.21 | + | 13656678 | 13657837 | pseudogene | 1 | - | Rhesus | 21,27 | | 18q21.32 | + | 58377841 | 58380952 | pseudogene | 1 | - | Gibbon | 17,21 | | 18q21.33 | + | 60149574 | 60150323 | pseudogene | 1 | - | Gibbon | 25,04 | | 19p12a | + | 20210345 | 20212271 | provirus | 2 | - | Gorilla | 58,42 | | 19p12b | + | 21812187 | 21817584 | pseudogene | 1 | W | Gorilla | 22,90 | | 19p12c | + | 22928203 | 22934876 | pseudogene | 1 | W | Gibbon | 25,59 | | 19p12d | + | 24129884 | 24130952 | pseudogene | 1 | - | Rhesus | 29,50 | | 19q13.2a | + | 40577847 | 40578561 | pseudogene | 1 | - | Rhesus | 36,86 | | 19q13.2b | - | 41492147 | 41494054 | provirus | 2 | - | Rhesus | 62,29 | | 20p13 | - | 171333 | 174808 | pseudogene | 1 | - | Gibbon | 26,76 | | 20q13.2 | + | 53965519 | 53969590 | pseudogene | 1 | - | Gibbon | 30,15 | | 21q21.1 | - | 20125060 | 20132866 | provirus | 1 | W | Gibbon | 24,54 | | 21q21.3 | + | 28226756 | 28234297 | provirus | 1 | W | Rhesus | 27,93 | | 21q22.2 | - | 41111191 | 41118353 | pseudogene | 1 | W | Gibbon | 27,40 | | 22q12.3 | - | 34345530 | 34345988 | pseudogene | 1 | - | Gibbon | 38,21 | | Xp22.31 | - | 7617210 | 7622109 | pseudogene | 1 | W | Rhesus | 28,65 | | Xp11.3 | + | 46046300 | 46049013 | pseudogene | 2 | - | Rhesus | 36,42 | | Xp11.21 | - | 57424992 | 57432088 | pseudogene | 1 | W | Rhesus | 39,21 | | Xq12 | - | 65517016 | 65519281 | pseudogene | 1 | - | Rhesus | 33,82 | | Xq13.3 | - | 75118132 | 75124909 | provirus | 1 | W | Gibbon | 25,72 | | Xq21.1a | - | 77602103 | 77606013 | pseudogene | 1 | W | Gibbon | 43,79 | | Xq21.1b | + | 79211390 | 79218603 | pseudogene | 1 | R | Orangutan | 16,68 | | Xq22.3a | + | 105244784 | 105248113 | pseudogene | 1 | - | Rhesus | 25,84 | | Xq22.3b | - | 106295361 | 106298094 | pseudogene | 1 | - | Rhesus | 18,64 | | Xq23 | - | 115,871,924 | 115,875,415 | pseudogene | 1 | - | Gibbon | 22,36 | | Xq26.2 | - | 131063277 | 131067083 | undefined | - | - | Rhesus | - | | Xq27.1 | + | 139159755 | 139162980 | pseudogene | 1 | - | Rhesus | 23,46 | | Yp11.2 | - | 7754065 | 7760683 | provirus | 2B | ? | Chimpanzee | 72,52 | | Yq11.222 | + | 21241822 | 21249383 | provirus | 1 | W | Chimpanzee | 55,06 | |
| --- | --- | --- | --- | --- | --- | --- | --- | --- | --- | --- | --- | --- | --- | --- | --- | --- | --- | --- | --- | --- | --- | --- | --- | --- | --- | --- | --- | --- | --- | --- | --- | --- | --- | --- | --- | --- | --- | --- | --- | --- | --- | --- | --- | --- | --- | --- | --- | --- | --- | --- | --- | --- | --- | --- | --- | --- | --- | --- | --- | --- | --- | --- | --- | --- | --- | --- | --- | --- | --- | --- | --- | --- | --- | --- | --- | --- | --- | --- | --- | --- | --- | --- | --- | --- | --- | --- | --- | --- | --- | --- | --- | --- | --- | --- | --- | --- | --- | --- | --- | --- | --- | --- | --- | --- | --- | --- | --- | --- | --- | --- | --- | --- | --- | --- | --- | --- | --- | --- | --- | --- | --- | --- | --- | --- | --- | --- | --- | --- | --- | --- | --- | --- | --- | --- | --- | --- | --- | --- | --- | --- | --- | --- | --- | --- | --- | --- | --- | --- | --- | --- | --- | --- | --- | --- | --- | --- | --- | --- | --- | --- | --- | --- | --- | --- | --- | --- | --- | --- | --- | --- | --- | --- | --- | --- | --- | --- | --- | --- | --- | --- | --- | --- | --- | --- | --- | --- | --- | --- | --- | --- | --- | --- | --- | --- | --- | --- | --- | --- | --- | --- | --- | --- | --- | --- | --- | --- | --- | --- | --- | --- | --- | --- | --- | --- | --- | --- | --- | --- | --- | --- | --- | --- | --- | --- | --- | --- | --- | --- | --- | --- | --- | --- | --- | --- | --- | --- | --- | --- | --- | --- | --- | --- | --- | --- | --- | --- | --- | --- | --- | --- | --- | --- | --- | --- | --- | --- | --- | --- | --- | --- | --- | --- | --- | --- | --- | --- | --- | --- | --- | --- | --- | --- | --- | --- | --- | --- | --- | --- | --- | --- | --- | --- | --- | --- | --- | --- | --- | --- | --- | --- | --- | --- | --- | --- | --- | --- | --- | --- | --- | --- | --- | --- | --- | --- | --- | --- | --- | --- | --- | --- | --- | --- | --- | --- | --- | --- | --- | --- | --- | --- | --- | --- | --- | --- | --- | --- | --- | --- | --- | --- | --- | --- | --- | --- | --- | --- | --- | --- | --- | --- | --- | --- | --- | --- | --- | --- | --- | --- | --- | --- | --- | --- | --- | --- | --- | --- | --- | --- | --- | --- | --- | --- | --- | --- | --- | --- | --- | --- | --- | --- | --- | --- | --- | --- | --- | --- | --- | --- | --- | --- | --- | --- | --- | --- | --- | --- | --- | --- | --- | --- | --- | --- | --- | --- | --- | --- | --- | --- | --- | --- | --- | --- | --- | --- | --- | --- | --- | --- | --- | --- | --- | --- | --- | --- | --- | --- | --- | --- | --- | --- | --- | --- | --- | --- | --- | --- | --- | --- | --- | --- | --- | --- | --- | --- | --- | --- | --- | --- | --- | --- | --- | --- | --- | --- | --- | --- | --- | --- | --- | --- | --- | --- | --- | --- | --- | --- | --- | --- | --- | --- | --- | --- | --- | --- | --- | --- | --- | --- | --- | --- | --- | --- | --- | --- | --- | --- | --- | --- | --- | --- | --- | --- | --- | --- | --- | --- | --- | --- | --- | --- | --- | --- | --- | --- | --- | --- | --- | --- | --- | --- | --- | --- | --- | --- | --- | --- | --- | --- | --- | --- | --- | --- | --- | --- | --- | --- | --- | --- | --- | --- | --- | --- | --- | --- | --- | --- | --- | --- | --- | --- | --- | --- | --- | --- | --- | --- | --- | --- | --- | --- | --- | --- | --- | --- | --- | --- | --- | --- | --- | --- | --- | --- | --- | --- | --- | --- | --- | --- | --- | --- | --- | --- | --- | --- | --- | --- | --- | --- | --- | --- | --- | --- | --- | --- | --- | --- | --- | --- | --- | --- | --- | --- | --- | --- | --- | --- | --- | --- | --- | --- | --- | --- | --- | --- | --- | --- | --- | --- | --- | --- | --- | --- | --- | --- | --- | --- | --- | --- | --- | --- | --- | --- | --- | --- | --- | --- | --- | --- | --- | --- | --- | --- | --- | --- | --- | --- | --- | --- | --- | --- | --- | --- | --- | --- | --- | --- | --- | --- | --- | --- | --- | --- | --- | --- | --- | --- | --- | --- | --- | --- | --- | --- | --- | --- | --- | --- | --- | --- | --- | --- | --- | --- | --- | --- | --- | --- | --- | --- | --- | --- | --- | --- | --- | --- | --- | --- | --- | --- | --- | --- | --- | --- | --- | --- | --- | --- | --- | --- | --- | --- | --- | --- | --- | --- | --- | --- | --- | --- | --- | --- | --- | --- | --- | --- | --- | --- | --- | --- | --- | --- | --- | --- | --- | --- | --- | --- | --- | --- | --- | --- | --- | --- | --- | --- | --- | --- | --- | --- | --- | --- | --- | --- | --- | --- | --- | --- | --- | --- | --- | --- | --- | --- | --- | --- | --- | --- | --- | --- | --- | --- | --- | --- | --- | --- | --- | --- | --- | --- | --- | --- | --- | --- | --- | --- | --- | --- | --- | --- | --- | --- | --- | --- | --- | --- | --- | --- | --- | --- | --- | --- | --- | --- | --- | --- | --- | --- | --- | --- | --- | --- | --- | --- | --- | --- | --- | --- | --- | --- | --- | --- | --- | --- | --- | --- | --- | --- | --- | --- | --- | --- | --- | --- | --- | --- | --- | --- | --- | --- | --- | --- | --- | --- | --- | --- | --- | --- | --- | --- | --- | --- | --- | --- | --- | --- | --- | --- | --- | --- | --- | --- | --- | --- | --- | --- | --- | --- | --- | --- | --- | --- | --- | --- | --- | --- | --- | --- | --- | --- | --- | --- | --- | --- | --- | --- | --- | --- | --- | --- | --- | --- | --- | --- | --- | --- | --- | --- | --- | --- | --- | --- | --- | --- | --- | --- | --- | --- | --- | --- | --- | --- | --- | --- | --- | --- | --- | --- | --- | --- | --- | --- | --- | --- | --- | --- | --- | --- | --- | --- | --- | --- | --- | --- | --- | --- | --- | --- | --- | --- | --- | --- | --- | --- | --- | --- | --- | --- | --- | --- | --- | --- | --- | --- | --- | --- | --- | --- | --- | --- | --- | --- | --- | --- | --- | --- | --- | --- | --- | --- | --- | --- | --- | --- | --- | --- | --- | --- | --- | --- | --- | --- | --- | --- | --- | --- | --- | --- | --- | --- | --- | --- | --- | --- | --- | --- | --- | --- | --- | --- | --- | --- | --- | --- | --- | --- | --- | --- | --- | --- | --- | --- | --- | --- | --- | --- | --- | --- | --- | --- | --- | --- | --- | --- | --- | --- | --- | --- | --- | --- | --- | --- | --- | --- | --- | --- | --- | --- | --- | --- | --- | --- | --- | --- | --- | --- | --- | --- | --- | --- | --- | --- | --- | --- | --- | --- | --- | --- | --- | --- | --- | --- | --- | --- | --- | --- | --- | --- | --- | --- | --- | --- | --- | --- | --- | --- | --- | --- | --- | --- | --- | --- | --- | --- | --- | --- | --- | --- | --- | --- | --- | --- | --- | --- | --- | --- | --- | --- | --- | --- | --- | --- | --- | --- | --- | --- | --- | --- | --- | --- | --- | --- | --- | --- | --- | --- | --- | --- | --- | --- | --- | --- | --- | --- | --- | --- | --- | --- | --- | --- | --- | --- | --- | --- | --- | --- | --- | --- | --- | --- | --- | --- | --- | --- | --- | --- | --- | --- | --- | --- | --- | --- | --- | --- | --- | --- | --- | --- | --- | --- | --- | --- | --- | --- | --- | --- | --- | --- | --- | --- | --- | --- | --- | --- | --- | --- | --- | --- | --- | --- | --- | --- | --- | --- | --- | --- | --- | --- | --- | --- | --- | --- | --- | --- | --- | --- | --- | --- | --- | --- | --- | --- | --- | --- | --- | --- | --- | --- | --- | --- | --- | --- | --- | --- | --- | --- | --- | --- | --- | --- | --- | --- | --- | --- | --- | --- | --- | --- | --- | --- | --- | --- | --- | --- | --- | --- | --- | --- | --- | --- | --- | --- | --- | --- | --- | --- | --- | --- | --- | --- | --- | --- | --- | --- | --- | --- | --- | --- | --- | --- | --- | --- | --- | --- | --- | --- | --- | --- | --- | --- | --- | --- | --- | --- | --- | --- | --- | --- | --- | --- | --- | --- | --- | --- | --- | --- | --- | --- | --- | --- | --- | --- | --- | --- | --- | --- | --- | --- | --- | --- | --- | --- | --- | --- | --- | --- | --- | --- | --- | --- | --- | --- | --- | --- | --- | --- | --- | --- | --- | --- | --- | --- | --- | --- | --- | --- | --- | --- | --- | --- | --- | --- | --- | --- | --- | --- | --- | --- | --- | --- | --- | --- | --- | --- | --- | --- | --- | --- | --- | --- | --- | --- | --- | --- | --- | --- | --- | --- | --- | --- | --- | --- | --- | --- | --- | --- | --- | --- | --- | --- | --- | --- | --- | --- | --- | --- | --- | --- | --- | --- | --- | --- | --- | --- | --- | --- | --- | --- | --- | --- | --- | --- | --- | --- | --- | --- | --- | --- | --- | --- | --- | --- | --- | --- | --- | --- | --- | --- | --- | --- | --- | --- | --- | --- | --- | --- | --- | --- | --- | --- | --- | --- | --- | --- | --- | --- | --- | --- | --- | --- | --- | --- | --- | --- | --- | --- | --- | --- | --- | --- | --- | --- | --- | --- | --- | --- | --- | --- | --- | --- | --- | --- | --- | --- | --- | --- | --- | --- | --- | --- | --- | --- | --- | --- | --- | --- | --- | --- | --- | --- | --- | --- | --- | --- | --- | --- | --- | --- | --- | --- | --- | --- | --- | --- | --- | --- | --- | --- | --- | --- | --- | --- | --- | --- | --- | --- | --- | --- | --- | --- | --- | --- | --- | --- | --- | --- | --- | --- | --- | --- | --- | --- | --- | --- | --- | --- | --- | --- | --- | --- | --- | --- | --- | --- | --- | --- | --- | --- | --- | --- | --- | --- | --- | --- | --- | --- | --- | --- | --- | --- | --- | --- | --- | --- | --- | --- | --- | --- | --- | --- | --- | --- | --- | --- | --- | --- | --- | --- | --- | --- | --- | --- | --- | --- | --- | --- | --- | --- | --- | --- | --- | --- | --- | --- | --- | --- | --- | --- | --- | --- | --- | --- | --- | --- | --- | --- | --- | --- | --- | --- | --- | --- | --- | --- | --- | --- | --- | --- | --- | --- | --- | --- | --- | --- | --- | --- | --- | --- | --- | --- | --- | --- | --- | --- | --- | --- | --- | --- | --- | --- | --- | --- | --- | --- | --- | --- | --- | --- | --- | --- | --- | --- | --- | --- | --- | --- | --- | --- | --- | --- | --- | --- | --- | --- | --- | --- | --- | --- | --- | --- | --- | --- | --- | --- | --- | --- | --- | --- | --- | --- | --- | --- | --- | --- | --- | --- | --- | --- | --- | --- | --- | --- | --- | --- | --- | --- | --- | --- | --- | --- | --- | --- | --- | --- | --- | --- | --- | --- | --- | --- | --- | --- | --- | --- | --- | --- | --- | --- | --- | --- | --- | --- | --- | --- | --- | --- | --- | --- | --- | --- | --- | --- | --- | --- | --- | --- | --- | --- | --- | --- | --- | --- | --- | --- | --- | --- | --- | --- | --- | --- | --- | --- | --- | --- | --- | --- | --- | --- | --- | --- | --- | --- | --- | --- | --- | --- | --- | --- | --- | --- | --- | --- | --- | --- | --- | --- | --- | --- | --- | --- | --- | --- | --- | --- | --- | --- | --- | --- | --- | --- | --- | --- | --- | --- | --- | --- | --- | --- | --- | --- | --- | --- | --- | --- | --- | --- | --- | --- | --- | --- | --- | --- | --- | --- | --- | --- | --- | --- | --- | --- | --- | --- | --- | --- | --- | --- | --- | --- | --- | --- | --- | --- | --- | --- | --- | --- | --- | --- | --- | --- | --- | --- | --- | --- | --- | --- | --- | --- | --- | --- | --- | --- | --- | --- | --- | --- | --- | --- | --- | --- | --- | --- | --- | --- | --- | --- | --- | --- | --- | --- | --- | --- | --- | --- | --- | --- | --- | --- | --- | --- | --- | --- | --- | --- | --- | --- | --- | --- | --- | --- | --- | --- | --- | --- | --- | --- | --- | --- | --- | --- | --- | --- | --- | --- | --- | --- | --- | --- | --- | --- | --- | --- | --- | --- | --- | --- | --- | --- | --- | --- | --- | --- | --- | --- | --- | --- | --- | --- | --- | --- | --- | --- | --- | --- | --- | --- | --- | --- | --- | --- | --- | --- | --- | --- | --- | --- | --- | --- | --- | --- | --- | --- | --- | --- | --- | --- | --- | --- | --- | --- | --- | --- | --- | --- | --- | --- | --- | --- |

aClassification based on phylogenetic analysis of 5’ and 3’ LTRs and gag and pol genes, supported by the identification of key mutations with respect to the epBase Update generated reference LTR17-HERV17-LTR17

bOldest common ancestor, refers to most distant species that shares the sequence. Identified by RepeatMasker HERV17 annotations after BLAT searching for the primates orthologous locations in the Chimpanzee, Gorilla, Orangutan, Gibbon, Rhesus and Marmoset available genomes on the UCSC Genome Browser

c estimated time of integration, in million years

d Impossible to define due to the lack of the retroviral portion involved in classification

e Impossible to unambiguously assign

*Sequence found as solitary LTR
